# Supplementary material for: Comparative Genomics of Large Mitochondria in Placozoans
Source: PubMed Central journal article supplement (PMC1781491; doi:10.1371/journal.pgen.0030013), 2007-01-12
Supplement: pgen.0030013.sd002.pdf [file pgen.0030013.sd002.pdf]

## Dataset S2: Amino acid sequence alignment of *RVT-IM*

Three of the four placozoan mtDNAs sequenced contained an open reading frame encoding a reverse transcriptase and an intron group II maturase domains (*RVT-IM*).

Below is the amino acid sequence alignment for this gene. Box shade ■ indicates identical amino acids and box shade ■ indicates chemically similar, but not all identical amino acids.

| Taxon name        | Abbreviation |                                                      |     |
|-------------------|--------------|------------------------------------------------------|-----|
| BZ2423            | B1           |                                                      |     |
| <i>Trichoplax</i> | B2           |                                                      |     |
| BZ49              | A1           |                                                      |     |
| B1                |              | -----MNR                                             | 3   |
| B2                |              | MLLT---DRR---ATVRLKEDGE---TRPPVSEQLADKVGLTYHNI       | 38  |
| A1                |              | MYVVGMDVDRAYFTAATMIIAVPTGIKIFVROPIVRMNGQLMISNCHNV    | 50  |
| B1                |              | LIV-----N---P---RS---FW---RVLSADRFNR---              | 22  |
| B2                |              | LIVFKHYILGKKHVRNGIIGPSTDRSGAIGADWSSGPRFISITSSLKDE-   | 87  |
| A1                |              | RTFSELGSSERK-LKN---IAS---RK---KAW---MERNVEVKGLQNVLS  | 88  |
| B1                |              | ---IQCV-YIIFK---P-GSN---P---KNRAPGPPKK---RNSLF       | 51  |
| B2                |              | --QVNCKPEVFFGGFCLPIGAEGALGRPG--ALRAPGAPFNSKLAQRALL   | 133 |
| A1                |              | MVRANLWSSLLYG---KSLGRNGAFMLPMTIWIILVFGVVQHKTGGGEALW  | 135 |
| B1                |              | --LGS-----RFSLIIDCFY--IGIHKLR--ANOGIQWIRDQ---        | 82  |
| B2                |              | RALGGPPLRGPNRAPRFSLICDCFY--IGIHKLR--ADQGIHWIRDR---   | 176 |
| A1                |              | APLPPQAER-----RPKDGKHTYGSILGSKINLYDNRVRIVRKRGAF      | 179 |
| B1                |              | --KGIFQTREIQCFVLPFSPVNHLPFP-QLG-Q-----DSW-----       | 115 |
| B2                |              | --KGIFQTREIQCFVLPFSPVNHLPFPISIGPQRIPKGSFWGRS-----    | 219 |
| A1                |              | GAPGFFS-KDWQPSFFPTKWPKYKICWGPSSNG-SVVSFFRYYYVAEPNSIK | 227 |
| B1                |              | -----LPG-----WDRGSVVRYRKGPN-----FOIKLFFR-----        | 140 |
| B2                |              | -----APSAPILFCRWGRGSVVRYRKGPN-----FOIKLFFRRDLEGPK    | 258 |
| A1                |              | NQAKRGAPAP---LAPWPRKAAPLAP-GPGREKVIKKIRDLTQRVVKDPG   | 273 |

B1 -----AAGCSVVTLTLSREA-----P--QKK--GIPF-- 163  
 B2 -----TTLGPAPKALAPSRAGSNGLRSGAWPMVPGTQKM--GFPLFL 299  
 A1 RVIDRKLYNLV<sup>1</sup>CNPF<sup>2</sup>MLEFA<sup>3</sup>YNNIK--KKGG-----KIDL<sup>4</sup>KKGG<sup>5</sup>GNPV-- 314

B1 --SVGLYRLYSSKRRRLRRPVLKLKTLWNG----NKKNK----NFIVKDLF 203  
 B2 WGAVGLYRLYSSKRRLPRPVLKLRTLWNG----SKKNK----NFIVKDLF 341  
 A1 --GSPSGSL<sup>1</sup>LT<sup>2</sup>TK<sup>3</sup>GI<sup>4</sup>VP<sup>5</sup>KT<sup>6</sup>L<sup>7</sup>DE<sup>8</sup>TS--WN<sup>9</sup>ILLALAKEL<sup>10</sup>KEEK<sup>11</sup>F<sup>12</sup>Q<sup>13</sup>F<sup>14</sup>K<sup>15</sup>PK<sup>16</sup>KGS 360

B1 RYIMDK--DLWFLATKEYPK-KNILVLQKIVRIILESIYEPLFSFHSFG 249  
 B2 RYVMDK--DLWFLATDRDPK-KNIV--RQIVRIILESIYEPLFSFHSFG 385  
 A1 KII<sup>1</sup>IG<sup>2</sup>SQ<sup>3</sup>RV<sup>4</sup>SS<sup>5</sup>IP<sup>6</sup>FT<sup>7</sup>IA<sup>8</sup>PS<sup>9</sup>DPL<sup>10</sup>GPK<sup>11</sup>IV--LE<sup>12</sup>VMR<sup>13</sup>ML<sup>14</sup>LN<sup>15</sup>I<sup>16</sup>IF<sup>17</sup>EP<sup>18</sup>S<sup>19</sup>FL<sup>20</sup>DC<sup>21</sup>SH<sup>22</sup>G 408

B1 FRPGKTQHTA<sup>1</sup>IKKIREN--FKGVNWFIEGKGN<sup>2</sup>KK<sup>3</sup>LCLMGASDRH<sup>4</sup>Q<sup>5</sup>RSP- 295  
 B2 FRPGKTQHTT<sup>1</sup>IKKIREN--FKGVNWFIEGKGS--LKSFGDTP-PQ<sup>2</sup>RGPF 429  
 A1 YRS<sup>1</sup>GR<sup>2</sup>GL<sup>3</sup>HS<sup>4</sup>VF<sup>5</sup>NYL<sup>6</sup>KT<sup>7</sup>GAL<sup>8</sup>CT<sup>9</sup>P<sup>10</sup>GV<sup>11</sup>R-IIE--GN--K<sup>12</sup>CFF<sup>13</sup>KIDH----- 446

B1 -DPLLNLLKKKIKDKKFISFLLSNIF---VHTSP-KTMGPAPVVRSVRPG 340  
 B2 GAPLLNLLKKKIKDKRFISFLENNILE--TPETPEKTMRPDGSGSARPG 477  
 A1 -SILMNIIE<sup>1</sup>KKIL<sup>2</sup>DR<sup>3</sup>OFT<sup>4</sup>KL<sup>5</sup>LW<sup>6</sup>KS<sup>7</sup>L<sup>8</sup>GAGY<sup>9</sup>IE<sup>10</sup>EGEG<sup>11</sup>GIR<sup>12</sup>RFP<sup>13</sup>PN<sup>14</sup>LA<sup>15</sup>AP<sup>16</sup>LAPG 495

B1 LLIEPLLFNIIFHEFDMYMEKILKNLGS-TGSWGRVP-RPGGAKHPKSKL 388  
 B2 FILEPLLFNIIFHEFDMYMEKLIRNIK--KGGRRKAPLOPLGALK-KSKL 524  
 A1 SIIS<sup>1</sup>PIL<sup>2</sup>YNI<sup>3</sup>YL<sup>4</sup>HK<sup>5</sup>IDE<sup>6</sup>Y<sup>7</sup>IL<sup>8</sup>KLM<sup>9</sup>V<sup>10</sup>SF<sup>11</sup>DIG<sup>12</sup>KGAK<sup>13</sup>SR<sup>14</sup>DP<sup>15</sup>FD<sup>16</sup>PAY<sup>17</sup>APR-----F 541

B1 GVLIRESQPARLLATRTRSSYGRRRSKNYLI<sup>1</sup>IKHLGYVRYA----TFFL 434  
 B2 -VFE<sup>1</sup>G<sup>2</sup>TK<sup>3</sup>GP<sup>4</sup>TDK--NNRADP<sup>5</sup>TD<sup>6</sup>PS<sup>7</sup>RV<sup>8</sup>PC<sup>9</sup>GG<sup>10</sup>PI<sup>11</sup>IKHLGYVRFAGSNGSPFL 571  
 A1 -LYSGGGSP<sup>1</sup>EGS---PPP<sup>2</sup>KK<sup>3</sup>KK<sup>4</sup>G-I<sup>5</sup>VP<sup>6</sup>GG<sup>7</sup>GE<sup>8</sup>PI<sup>9</sup>GL<sup>10</sup>SP<sup>11</sup>GP<sup>12</sup>KGS----- 578

B1 IGILGPRSAICKLKKQICADRHQWCPGAAL<sup>1</sup>EP<sup>2</sup>NLV<sup>3</sup>ISS<sup>4</sup>SDPKRNQLPR- 483  
 B2 IGIRGPRSAIF<sup>1</sup>KLKE<sup>2</sup>QICRLGGVGRGYGAAOPO--KIGSVGAHWIGAPKD 619  
 A1 A-SL<sup>1</sup>GALS<sup>2</sup>AP<sup>3</sup>GS<sup>4</sup>VGSALC<sup>5</sup>WAD<sup>6</sup>FPY<sup>7</sup>KRISYFRL<sup>8</sup>F<sup>9</sup>NYWIIA<sup>10</sup>FKGSY<sup>11</sup>SETVEI 627

B1 ---FLGYIISQKIRK<sup>1</sup>KYKR<sup>2</sup>GGGSVYRRSAEWRLIP--KGE<sup>3</sup>GHSNAFESP- 527  
 B2 T--FW<sup>1</sup>G-----PRRPTK--GLLSVN--RSLDP-LDPN<sup>1</sup>WSSW<sup>2</sup>GHNIVISSSD 658  
 A1 HSKV<sup>1</sup>LG-----FC<sup>2</sup>RD<sup>3</sup>VL<sup>4</sup>KL<sup>5</sup>KG<sup>6</sup>NI<sup>7</sup>RC<sup>8</sup>PS<sup>9</sup>V<sup>10</sup>VND<sup>11</sup>LDV-----KDAP<sup>12</sup>FV<sup>13</sup>G-- 664

B1 PLTN-HW----IRGPGTEPRRLPAISAPGQLSSYRMYLKMDSNIVITYLA 572  
 B2 PKRNOOR----FLGYIISQKATNKYKRGGSNGSRMYFKMDNNIVITYLA 704  
 A1 PIKNIQKDKIVIFGINVFRSKHVKFSRKGEPCGLRD-FSINLSSIKKKLR 713

B1 KKGFWDGAPKGPPIK-GPFGPGSFNSIQGLWAQLERYYHLANDKQOKLGR 621  
 B2 KKGFCDGGG-APIPNFGAEGAGSLNSVQGLWALFSRYYHLANDKQOKLGR 753  
 A1 EINILKGEK--PIPR-----LAWSPLG-----SEQ----- 736

B1 IGYIFEHSEAKYFAACFRLKTRRQVFKKIGWSYDGPPFKPLFFGFRVPV- 670  
 B2 ISYILKHSIAKYFAACFRLKTRRQVFKKIGGRS-LTLFKPLSFGFRAPVG 802  
 A1 ILLIFNSVLKEYFGHFDLVRGR-----GAK-----GSGAPQK 768

B1 -VPAKVAR-----QRSHSF--FCHNVIKYPPIN-FNFFINPPNLCTR- 708  
 B2 GTPRKGPOPVGAFGAQRSHSWGAFGADVKKYPSINSTNFFIKSPDIDSKS 852  
 A1 ADPMDPGR-----LRRPHFARFKFWLK----- 790

B1 IGIVEGISVFLTNTGVFQIQTT-----FLIDCA--QDIFLGPKG--- 745  
 B2 LGIVEGISVSLTNTGVFQIQTTLGAEGAYFGVDSTTPQSTNSVGAEGAQF 902  
 A1 --WVITTSAERTLARKYNTSTN-----KIGGR-----PRG--- 818

B1 -----  
 B2 LHTFYTGRRL 912  
 A1 -----KR- 820
