# Supplementary material for: Comparative Genomics of Large Mitochondria in Placozoans
Source: PubMed Central journal article supplement (PMC1781491; doi:10.1371/journal.pgen.0030013), 2007-01-12
Supplement: pgen.0030013.sd003.pdf [file pgen.0030013.sd003.pdf]

**Dataset S3: Amino acid sequence alignment of *polB***

Strain BZ49 contained an open reading frame similar to fungal DNA polymerase type B (*polB*). The following is an amino acid sequence alignment for this gene using BZ49 and five fungal taxa: *Agrocybe aegerita*, *Neurospora intermedia*, *Neurospora crassa*, *Hebeloma circinans*, and *Pleurotus ostreatus* with accession numbers: AAC33727, NP\_049544, CAA39046, CAA72280, and NP\_053000 respectively. Box shade ■ indicates that  $\geq 60\%$  of amino acids are identical and box shade ■ indicates chemically similar, but not all identical amino acids.

| <b>Taxon name</b>            | <b>Abbreviation</b> |
|------------------------------|---------------------|
| BZ49                         | po1                 |
| <i>Agrocybe aegerita</i>     | po2                 |
| <i>Neurospora intermedia</i> | po3                 |
| <i>Neurospora crassa</i>     | po4                 |
| <i>Hebeloma circinans</i>    | po5                 |
| <i>Pleurotus ostreatus</i>   | po6                 |

```

po1 -----
po2 -----
po3 -----
po4 -----
po5 -----
po6 MSDDASAI AAGGGAASALIKSIPNASISTKAIGGTAVSIGVTAGVKIGVH      50
  
```

```

po1 -----
po2 -----
po3 -----
po4 -----
po5 -----
po6 VGSKCIENDSMSKAIESLDESVKTRPYAEPTPDRI P SPDQNWINSPLEND      100
  
```

po1 -----  
 po2 -----  
 po3 -----  
 po4 -----  
 po5 -----  
 po6 SIPLIDILGDLISLNLLEIFLLLLCILLLLIIKNNLNKGSLSNKMIWKVITK 150

po1 -----  
 po2 -----  
 po3 -----  
 po4 -----  
 po5 -----  
 po6 FVPQIYQDKINNI IKTGKEYNNKINNI I IYVLILII I ILLILGNLITCNEL 200

po1 -----  
 po2 -----  
 po3 -----MIKFYFTTF 9  
 po4 -----MIKFYFTTF 9  
 po5 -----SFQLILE 7  
 po6 YNNIDKYVLVYNYKINKKLLFLICVKNLWSNNNNISLRKNINNVNLIGD 250

po1 -----  
 po2 -----  
 po3 HMKFPARLFSTSG---NRANIEQNSSNEVQNQIKYLKDFKKNP----- 50  
 po4 HMKFPARLFSTSG---NRANFEENSSNEVQNQIKYLKDFKKNP----- 50  
 po5 KIKSQEKRLKES----IRLVKDGVLRS DGKNKIGEGTDFPSNI----- 47  
 po6 CISKREYSLNQNSNTNREININNLDKYHKEDLEKLYNFGLTNPDFVKNN 300

po1 -----  
 po2 -----  
 po3 -----KWKWESTTEPKHMI----- 64  
 po4 -----KFNWESTTEPKHMI----- 64  
 po5 -----KRFMKTSLIAQVKG----- 61  
 po6 IEFNLIMETLERRFDKSNDLTNDRIKQRKMKFNDGYIEVGEFKNIVLLTD 350

po1 -----  
 po2 -----  
 po3 -LSNIGEYEKND-----FNLKSLLNINEFNINVELLRQLFMKLDKNFT 106  
 po4 -LSNIGEYEKND-----FNLKSLLNINEFNINVELLRQLFMKLDKNFT 106  
 po5 -NNYGTLLISKDE-----IEGANLNLIFNLNMETDSLYNLSLKNKR--- 100  
 po6 DLSPIGDVQTIENEQDHILNESFNLYNMLEYKKRFEOILLNYCKEGKTYK 400

po1 -----  
 po2 -----  
 po3 YALGVILRNVD SNTN---- ISVDRHFLVIFNTDPLIILQQIYDRIIFLSE 152  
 po4 YALGVILRNVD SNTN---- ISVDRHFLVNFNTDPVILQQIYDRIIFLSE 152  
 po5 YFVKVSLLRDNEE----- 114  
 po6 MIFKVNLIINVEISGIGEIQSKTTPSFLIHRHSNIDYILIKFSNSIMDLLF 450

po1 -----  
 po2 -----  
 po3 KYYLEPVDKLFIRLRKLNFKV---KNPVFHPIAKEKTNLHTTIPKGKSKL 199  
 po4 KYYLEPVDKLFIRLRKLNFKV---KNPVFHPIAKEKTNLHTTIPKGKSKL 199  
 po5 ----VLLLKVTIFLDKQSHDS---KNGLSFMNFQEMVNWTD SIKQG---- 153  
 po6 QYNIADRVNINIFIKEWIDSSSELKNIASLYPILNKKENSIVSKYLDKLNK 500

po1 -----  
 po2 ---MVP SKTSP-----NRDTKLIISMDLETILINNKHIPY---LL 33  
 po3 SRPEFVPH TMDLKFYGVETKHKDKENIRIFDNGNVILKVKI IKDGVNHLI 249  
 po4 SRAEFVPH TMDLKFYGVETKHKDEKNIRIFDNGKVI LKVKI IKDGVYHLI 249  
 po5 AEGEVVERYSVETGYKITFKQDVITRVDKQFHSKTLVRS LRDYE-EDKNI 202  
 po6 NITDNVIDKTQLGLLGI TRKSKSSLLVKGLNYGKIITNENLVSTYDKMIN 550

po1 -----  
 po2 SWYDGN----- 39  
 po3 DVISRD-----NRLLYQF----- 262  
 po4 DVISRD-----NRLLYQF----- 262  
 po5 GSIDIE-----TYLNENN----- 215  
 po6 NYYSLNDNDNDNYNRLNQDNKLLDIKYKLSYGSIQSKKEYIIKVS NVDN 600

po1 -----MYLTQD----- 6  
 po2 -----ITKSYFIDSIENNIENN----- 56  
 po3 -----EDVKHGDGLKRHWINDNMYYYYDNT----- 288  
 po4 -----EDVKHGDGLKRYWINDNMYYYYDNT----- 288  
 po5 -----EAVPYAIGFKTVKGTCLFYLDSS----- 239  
 po6 ITNEVSAYIEVKENNIKLLKVEEWDNIKYNQSEFTKNENTVIICIRNI 650

po1 -----INPE-----Q-----LIMFSIGRILIP 23  
 po2 -----IEN-----MISRAMNDICIR 71  
 po3 -----LVNVETPQKVGNI EPTKRDKRQDKKILAFDIETFQVP 325  
 po4 -----LVNVETPQKVGNI EPAKRDKTQDKKILAFDIETFQVP 325  
 po5 -----NPSN-----MLDCLQYMLVK 255  
 po6 KGSSQKMTFVNNQLENIEYKYNCKLIEESRLDLKLNKIGTFDFETYLDK 700

po1 -----KYHNYT 29  
po2 -----KYKNYK 77  
po3 TGNDSTMIAYACGFYDGNKSLTYYISDFISQREMLLACIKDMLKYDKHT 375  
po4 TGNDSTMIAYACGFYDGKKSLTYYISDFISQREMLLACIKDMLKYDKHT 375  
po5 -----ENHNFK 261  
po6 --NQNAIPYYIGCRTGDKKVFYKYSDYLNVDEMVLKFILDLMVIENDNRF 748

po1 IYTHNLKMFDVHFLIKAIGKT----DWKTNVIMD-DNNNIISLKLWKYN- 73  
po2 VYTHNFAKFDGYFLVKYLSKLG---FIDNIIINK--GR-IITLKFIYNKY 121  
po3 VYCHNFSKFDINFIIKILVQE----FVVEKIISK-DLD-ILSIKISYKFE 419  
po4 VYCHNFSKFDINFIIKILVQE----FVVEKIISK-DLD-ILSIKISYKFE 419  
po5 FYAHNMGEFDGVFLLKSLMTSSHLHDLKFNVYSNNDGK-IISLDIVKRIV 310  
po6 YYAHNLSDFDGMFVLKSLINTSKSHDLKIKVLSKNDGT-IISLEIKKILI 797

po1 -----KSWIH-LKLKDSLLLLLNTSLYNLGQINTEYR-K 105  
po2 S-----I--TFKDSYLLLPSSLKLKSFNTQTQ-K 149  
po3 PKKGGKAERHTITTADSCRLLPGSLDKLAKDHNIITK-----K 458  
po4 PKKGGKAERHTITTADSCRLLPGSLDKLAKDHNIITK-----K 458  
po5 K-----QKKTIKITILDSYLLLPSLKKVAKVFNCNES-----K 344  
po6 N-----KKIIKITILDSLHLLPSLRDLGKVFLKKNSFYNETKNIIGK 841

po1 DNFPYSFMTSE----TIYYKGVCPPDKYWNKPPKN-----RV 138  
po2 DIFPYLLDDIN-----YIGEVPDYKYFCNLEMEEYN---NYKS---NF 186  
po3 GKFPYKFVNKD----NLEYVGLIPDYEYIDPKGEMITLFEWAA--MYT 502  
po4 GKFPYKFVNKD----NLEYVGLLPDYEYIDPKGEMITLFEWAA--MYT 502  
po5 GLFPYKFIERD----NINYKGVIPEIKYFTDLSIKDYN---KYSE--DLK 385  
po6 GNFPHDFIQLGIDKALEYKGLVPDIKYFDNLSEEDYITEIVNRIKNEEN 891

po1 QIWDARVETLKYLENDLKTLYEVINKYADEIFKKYQINITDHNTISSLSL 188  
po2 KVWNFREEAIKYCNDCISLYEILYKENTLVFNKFELNINKYPTLPSLSF 236  
po3 NKWSTRKETIIYLEKDIKALYQLMMEMSNNTYSTFRINITRVKTASALAF 552  
po4 NKWSMRKETIIYLEKDIKALYQLMMEMSNNTYSTFRINITRVKTASALAF 552  
po5 GIWDCKEQTIDYLVKDLDILYEIMHKFNDTIFREYHVNITRIRTISGLAF 435  
po6 GVWDCKELLKYLNGDIDTLYSVMYTFGEFIFDKFNINITRIRTYSGLAF 941

po1 KIFOSNF-----YDMSKN---T---LQTLTGI 209  
po2 ALEKTKY-----LKENE-----VHMLSGS 255  
po3 LVYRTLFLPNEVEEEEENETTSPNNILSLFDKKEEKLTPKYFLPKLKGR 602  
po4 LVYRTIFLPNEVEEE---NETNSPNNILSLFDKKEEKLTPKYFLPKLKGR 600  
po5 LIYTAIY-----YKVKDKP-----IYYTSGK 456  
po6 LIYTSRY-----YDSIKKP-----IFLTTGK 962

po1 SETQIRHAYRGGMVMNKRREIE---KGYLYDVNSLYPYAMLN--PMPMGHP 255  
 po2 IATNIRKSYTGGSVDMYIPLIEKDSKIFTYDINSLYPFSMKSFKFPIGNP 305  
 po3 LERAVRAAYFGGRNEIFIPIN---NIFSFDFNSLYPTAMMM--PMPVGIIP 648  
 po4 LERAVRAAYFGGRNEIFIPIN---NIFSFDFNSLYPTAMMM--PMPVGIIP 646  
 po5 LEQFIRKGYGGIVDVLTEYTDf--ETKYDVNSHYPCAMLK--PMPGGIIP 503  
 po6 IDNYIRNAYYGGIVDSWTFYSEK--PLFKYDFKSHYPNQMRNNPMPGGIIP 1010

po1 ELSN---DKELNNYFGFVYVEVSPP---NTNIPILPFP-IEYKEGQ---- 294  
 po2 TFFKGDITRINKDAFGFYCKIITP--EYLEHPILOTHLKTSDGIRTLAP 353  
 po3 VHTF---SKNLNEIFGFVRAKIITP---AINIPVLPCK-VKVNGVQKLIF 691  
 po4 VHTF---CKNLNEIFGFVRAKIITP---AINIPVLPCK-VKVNGVQKLIF 689  
 po5 AVST---EKNLDNIFGFVEAIVEAPTKEELRVAILPCK-KDGKTVLFR-- 547  
 po6 IFST---ETNLDLIFGFVRAEVTAPSEKELRVAILPIKGPNGELITFR-- 1055

po1 ---KFKGWYFSEELKNAQKYGYKIKLFGG-YKFKKQYKMFDTFVKTFYQM 340  
 po2 -IGSWEDMLFSEEMYNAMKYGYKFEILWG-YTFESK-NIFSEIISDLYKM 400  
 po3 PIGEWIGWYFSEELKLAVEYGYKIEVLES-YVFEKRDDPFKEYIEHFASI 740  
 po4 PIGEWIGWYFSEELKLAVEYGYKIEVLES-YVFEKRDDPFKEYIEHFASI 738  
 po5 --DTVEGVVWSEELKMAREYGYKILEIKTCIVFDKVEEQFDSYIKNIYSK 595  
 po6 --GTVEGTWFSEELKNAETYGYKIKVKDC-LOFEKVYNLFDDFVNEFYNL 1102

po1 KVEGDSTN----RMVAKTMLNSLYGRIGMK--EQYISAYFVNK-KDAEQV 383  
 po2 RLEYQKSDP--MNYIAKILMNSLYGRIGMDDNFTFSDIMDKDDYFNFEKL 448  
 po3 KDNTKGSK----KOMAKLLLNTLYGRIGMNSAAEIKMLTTNE-LDNIQL 785  
 po4 KDNTKGSK----KOMAKLLLNTLYGRIGMNSAAEIKMLTTNE-LDNIQL 783  
 po5 KLOAEKEKNEIQRLNKLMLNSLYGRIGIKDNNNNLKIVKQDT- IKKGLE 644  
 po6 KFEAEMNKDDISRLTYKLILNSLSGRVGLRDLNTEMKVIESKD-LNFLNK 1151

po1 LKNKEAILEWEYDN-KMLIRT-----QTRLELSNKIKN----- 414  
 po2 DRNNSILDVTELNNNNFLVTTKNP-----KVELDTILDN----- 482  
 po3 TNN--VIHEFEVDDDKHYVRYDKKPCPVLCQAQSEKNEYELLSYLDGE---- 829  
 po4 TNN--VIHEFEVDDDKHYVRYDKKPCPVLCQAQSEKNEYELLSYLDGE---- 827  
 po5 TEN--SDILSESNN-LYLVKSQGPLDPEILNIINKEKLFESHDKGFNAK- 690  
 po6 TEN--VDTLFESNR-LSLIKSHGPLDPEVVDLFSKENLTENKKNINPFIED 1198

po1 --KLERPTPASIQTAAAITAYARIFM--SKYIQKSHYT--DTDSIVVSKP 458  
 po2 ---GSEKHDINIAIASAITAYSRIQMSKFKNNPNFKLFYSDTDSVYISKE 529  
 po3 --KDDGFIINSTSIAAATASWSRILM--YKHIINSAYT--DTDSIFVEKP 873  
 po4 --KDDGFIINSTSIAAATASWSRILM--YKHIINSAYT--DTDSIFVEKP 871  
 po5 --NPWKGVSSSVOLSAAITAYARMYLNKFKNIPGNEYLGCDTDSIILTHP 738  
 po6 KDKPWGKNKSAVOLSAAISAYGRISM SKVKNISDNLYFGGDTDSFILEKP 1248

|     |                                                                                                                                                                                                                                                                                                           |      |
|-----|-----------------------------------------------------------------------------------------------------------------------------------------------------------------------------------------------------------------------------------------------------------------------------------------------------------|------|
| po1 | LPK <b>R</b> E <b>I</b> G <b>V</b> S <b>C</b> ----- <b>I</b> T <b>V</b> I <b>C</b> V <b>S</b> S <b>C</b>                                                                                                                                                                                                  | 477  |
| po2 | L <b>P</b> E <b>E</b> L <b>V</b> S <b>N</b> T <b>E</b> L <b>G</b> ----- <b>K</b> M <b>K</b> K <b>E</b> G <b>T</b> <b>C</b>                                                                                                                                                                                | 549  |
| po3 | L <b>D</b> S <b>A</b> F <b>I</b> G <b>E</b> G <b>C</b> G <b>K</b> F <b>K</b> A <b>E</b> <b>F</b> <b>Y</b> <b>N</b> G <b>O</b> L <b>I</b> K <b>R</b> A <b>T</b> <b>F</b> <b>I</b> S <b>G</b> <b>K</b> L <b>Y</b> L <b>L</b> D <b>F</b> G <b>-</b> G <b>K</b> L <b>E</b> I <b>K</b> C <b>K</b> G <b>I</b> T | 922  |
| po4 | L <b>D</b> S <b>A</b> F <b>I</b> G <b>E</b> G <b>C</b> G <b>K</b> F <b>K</b> A <b>E</b> <b>F</b> <b>Y</b> <b>N</b> G <b>O</b> L <b>I</b> K <b>R</b> A <b>T</b> <b>F</b> <b>I</b> S <b>G</b> <b>K</b> L <b>Y</b> L <b>L</b> D <b>F</b> G <b>-</b> G <b>K</b> L <b>E</b> I <b>K</b> C <b>K</b> G <b>I</b> T | 920  |
| po5 | L <b>E</b> K <b>E</b> F <b>V</b> G <b>K</b> D <b>L</b> G <b>L</b> F <b>K</b> L <b>E</b> H <b>-</b> - <b>V</b> I <b>V</b> E <b>G</b> F <b>Y</b> L <b>T</b> K <b>K</b> F <b>Y</b> M <b>I</b> I <b>T</b> N <b>K</b> N <b>E</b> V <b>I</b> I <b>K</b> A <b>K</b> G <b>I</b> S                                 | 785  |
| po6 | L <b>D</b> S <b>S</b> M <b>I</b> G <b>K</b> K <b>L</b> G <b>O</b> A <b>E</b> L <b>E</b> <b>Q</b> ----- <b>V</b> I <b>V</b> E <b>A</b> F <b>F</b> H <b>C</b> K <b>S</b> <b>Y</b> L <b>I</b> I <b>N</b> D <b>K</b> N <b>E</b> T <b>I</b> I <b>K</b> M <b>K</b> G <b>I</b> N                                 | 1295 |

|     |                                                                                                                                                                                                                                                                                           |      |
|-----|-------------------------------------------------------------------------------------------------------------------------------------------------------------------------------------------------------------------------------------------------------------------------------------------|------|
| po1 | R----- <b>F</b> N----- <b>I</b> L <b>F</b> P <b>R</b> R <b>F</b> -----                                                                                                                                                                                                                    | 487  |
| po2 | DD----- <b>A</b> V <b>F</b> L <b>A</b> P <b>K</b> V <b>Y</b> G <b>Y</b> K <b>D</b> I <b>N</b> G <b>K</b> A <b>T</b> D-----                                                                                                                                                                | 571  |
| po3 | K <b>N</b> K <b>D</b> N <b>T</b> T <b>H</b> N <b>L</b> D <b>I</b> N <b>D</b> <b>F</b> E <b>A</b> L <b>Y</b> N <b>G</b> E <b>S</b> R <b>V</b> L <b>F</b> <b>Q</b> E <b>R</b> W <b>G</b> R <b>S</b> L <b>E</b> L <b>G</b> T <b>V</b> T <b>V</b> K <b>Y</b> <b>Q</b> K <b>Y</b> N <b>L</b> I | 972  |
| po4 | K <b>N</b> K <b>D</b> N <b>T</b> T <b>H</b> N <b>L</b> D <b>I</b> N <b>D</b> <b>F</b> E <b>A</b> L <b>Y</b> N <b>G</b> E <b>S</b> R <b>V</b> L <b>F</b> <b>Q</b> E <b>R</b> W <b>G</b> R <b>S</b> L <b>E</b> L <b>G</b> T <b>V</b> T <b>V</b> K <b>Y</b> <b>Q</b> K <b>Y</b> N <b>L</b> I | 970  |
| po5 | N <b>Q</b> N <b>N</b> -----L <b>L</b> N <b>Y</b> N <b>T</b> <b>F</b> L <b>E</b> L <b>F</b> K <b>G</b> N <b>T</b> V <b>T</b> <b>F</b> P <b>S</b> L <b>O</b> F <b>Q</b> K <b>N</b> Y <b>K</b> T <b>L</b> E <b>I</b> S <b>I</b> I <b>N</b> S-----                                            | 826  |
| po6 | K <b>P</b> N-----L <b>K</b> L <b>N</b> Y <b>N</b> K <b>F</b> V <b>O</b> L <b>F</b> K <b>G</b> E <b>D</b> I <b>K</b> I <b>Q</b> L <b>E</b> F <b>R</b> K <b>D</b> Y <b>K</b> -----                                                                                                          | 1327 |

|     |                                                                                                                                                                                                                                                                                    |      |
|-----|------------------------------------------------------------------------------------------------------------------------------------------------------------------------------------------------------------------------------------------------------------------------------------|------|
| po1 | ----- <b>L</b> C <b>S</b> -----                                                                                                                                                                                                                                                    | 490  |
| po2 | -----                                                                                                                                                                                                                                                                              |      |
| po3 | S <b>G</b> Y <b>D</b> K <b>R</b> E <b>K</b> L <b>Y</b> S <b>L</b> G <b>K</b> W <b>V</b> N <b>T</b> S <b>P</b> L <b>C</b> I <b>N</b> E <b>N</b> F <b>E</b> V <b>I</b> S <b>K</b> A <b>L</b> V <b>S</b> D <b>V</b> G <b>E</b> T <b>W</b> Y <b>R</b> K <b>R</b> I <b>H</b> Y <b>N</b> | 1022 |
| po4 | S <b>G</b> Y <b>D</b> K <b>R</b> E <b>K</b> L <b>Y</b> S <b>L</b> G <b>K</b> W <b>V</b> N <b>T</b> S <b>P</b> L <b>C</b> I <b>N</b> E <b>N</b> F <b>E</b> V <b>I</b> S <b>K</b> A <b>L</b> V <b>S</b> D <b>V</b> G <b>E</b> S <b>W</b> Y <b>R</b> K <b>R</b> I <b>H</b> Y <b>N</b> | 1020 |
| po5 | ---N <b>K</b> K----- <b>I</b> K <b>G</b> I <b>T</b> N <b>P</b> E <b>V</b> K <b>Y</b> K <b>I</b> M <b>N</b> ---R <b>S</b> I <b>A</b> Y <b>K</b> T <b>R</b> F <b>E</b> Y <b>Y</b>                                                                                                    | 856  |
| po6 | ----- <b>N</b> N <b>-</b> E <b>M</b> L <b>K</b> F <b>I</b> Y <b>I</b> K <b>Q</b> L <b>K</b> E <b>L</b> K <b>I</b> -----                                                                                                                                                            | 1346 |

|     |                                                                     |      |
|-----|---------------------------------------------------------------------|------|
| po1 | -----                                                               |      |
| po2 | -----                                                               |      |
| po3 | K <b>Y</b> N <b>H</b> I <b>I</b> Y <b>D</b> Y <b>L</b> K <b>V</b> F | 1035 |
| po4 | K-----                                                              | 1021 |
| po5 | S <b>L</b> -----                                                    | 858  |
| po6 | -----                                                               |      |
